# Supplementary material for: Cardiac Contractile Reserve Parameters Are Related to Prognosis in Septic Shock
Source: Hindawi journal article supplement (doi:10.1155/2013/930673), 2013-01-01
Supplement: f1 [file 930673.f1.pdf]

Table : Respiratory and biology description at day 0 and day 1.\* p-values from comparisons between survivors and non-survivors at Day 0 and Day 1 using the Mann-Whitney test.

|                                                        | 28-day survival |             |    |             | 28-day death |             |    |             | p*    | p*    |
|--------------------------------------------------------|-----------------|-------------|----|-------------|--------------|-------------|----|-------------|-------|-------|
|                                                        | n               | Day 0       | n  | Day 1       | n            | Day 0       | n  | Day 1       | Day 0 | Day 1 |
| <b>Respiratory</b>                                     |                 |             |    |             |              |             |    |             |       | 0.50  |
| Inspired oxygen fraction (%)                           | 43              | 85 ± 24     | 41 | 55 ± 20     | 27           | 79 ± 27     | 13 | 60 ± 22     | 0.21  | 0.52  |
| Positive end-expiratory pressure (cm H <sub>2</sub> O) | 39              | 8 ± 3       | 37 | 7 ± 3       | 23           | 7 ± 3       | 13 | 7 ± 4       | 0.39  | 0.30  |
| pH                                                     | 43              | 7.34 ± 0.09 | 41 | 7.38 ± 0.10 | 27           | 7.27 ± 0.14 | 14 | 7.34 ± 0.11 | 0.022 | 0.19  |
| pO <sub>2</sub> (mmHg)                                 | 43              | 161 ± 126   | 41 | 115 ± 42    | 27           | 124 ± 70    | 14 | 111 ± 36    | 0.66  | 0.97  |
| pCO <sub>2</sub> (mmHg)                                | 43              | 38 ± 9      | 41 | 37 ± 7      | 27           | 42 ± 14     | 14 | 37 ± 7      | 0.51  | 0.79  |
| Lactate (mmol/l)                                       | 43              | 3.1 ± 3.0   | 40 | 3.8 ± 6.2   | 27           | 3.2 ± 2.6   | 13 | 2.1 ± 1.1   | 0.58  | 0.68  |
| Bicarbonate (mmol/l)                                   | 43              | 21 ± 7      | 41 | 20 ± 6      | 26           | 18 ± 5      | 13 | 20 ± 4      | 0.054 | 0.50  |
| Duration of controlled mechanical ventilation (days)   | 42              | 9.9 ± 8.5   |    |             | 27           | 8.0 ± 8.2   |    |             | -     |       |
| <b>Biology</b>                                         |                 |             |    |             |              |             |    |             |       |       |
| Creatinine (mg/l)                                      | 43              | 21.5 ± 17.1 | 41 | 15.7 ± 9.7  | 27           | 19.7 ± 11.6 | 13 | 19.5 ± 12.8 | 0.99  | 0.30  |
| White blood cells (G/l)                                | 43              | 13.5 ± 10.6 | 41 | 17.5 ± 15.1 | 27           | 9.8 ± 11.3  | 13 | 11.6 ± 12.8 | 0.067 | 0,12  |
| Hemoglobin (g/dl)                                      | 43              | 10.5 ± 1.8  | 41 | 10.6 ± 1.4  | 27           | 9.2 ± 1.7   | 13 | 9.9 ± 1.9   | 0.005 | 0,22  |
| Platelets (G/l)                                        | 42              | 241 ± 170   | 41 | 211 ± 123   | 27           | 152 ± 158   | 13 | 132 ± 108   | 0.010 | 0,04  |
| Prothrombin ratio (%)                                  | 41              | 54 ± 18     | 32 | 53 ± 17     | 26           | 52 ± 15     | 8  | 59 ± 12     | 0,94  | 0,46  |
| Troponin (µg/l)                                        | 43              | 0.69 ± 2.59 | 34 | 1.03 ± 1.85 | 25           | 0.47 ± 1.13 | 12 | 0.76 ± 1.80 | 0.79  | 0,25  |
| B-type natriuretic peptide (ng/l)                      | 29              | 625 ± 677   | 21 | 572 ± 709   | 19           | 934 ± 778   | 11 | 796 ± 797   | 0.12  | 0,48  |
| Procalcitonin (mg/l)                                   | 36              | 34.1 ± 75.5 | 10 | 43.7 ± 83.3 | 24           | 29.4 ± 42.6 | 7  | 38.0 ± 49.5 | 0.24  | 0,42  |

**Table :** Association of significant factors with death at day 28. The sensitivity, specificity and area under ROC curves of the four factors illustrated in figure 4 were:

(AU ROC, Area Under the Receiver Operating Characteristic curve; SAPS II, Simplified Acute Physiology Score; CPI, Cardiac Power Index; CI, Cardiac Index.)

| Factor                | Cutoff                      | Sensitivity | Specificity | AU ROC |
|-----------------------|-----------------------------|-------------|-------------|--------|
| Double product        | > 11000 mmHg.bpm            | 70%         | 60%         | 0.65   |
| SAPS II               | $\geq 58$                   | 70%         | 65%         | 0.68   |
| CPI decrease at day 1 | $\geq 0.0 \text{ W/m}^2$    | 82%         | 65%         | 0.68   |
| CI decrease at day 1  | $\geq 0 \text{ ml/min/m}^2$ | 82%         | 58%         | 0.70   |
